# Supplementary material for: What is the Perceived Role of the Dietitian Amongst People with Cystic Fibrosis? Results of an International survey
Source: Atypon-hosted journal article supplement (doi:10.3148/cjdpr-2022-044), 2023-03-29
Supplement: cjdpr-2022-044supplb.pdf [file cjdpr-2022-044supplb.pdf]

**Table:** Demographic characteristics of individuals who responded to the cystic fibrosis survey

| Characteristic group                  | Cystic fibrosis survey<br>(n =295) |      | Characteristic group            | Cystic fibrosis survey<br>(n =295) |      |
|---------------------------------------|------------------------------------|------|---------------------------------|------------------------------------|------|
|                                       | n                                  | %    |                                 | n                                  | %    |
| Stakeholder type                      |                                    |      | PWCF gender                     |                                    |      |
| PWCF                                  | 137                                | 49.4 | Male                            | 113                                | 38.3 |
| Parent of a child <18 years with CF   | 97                                 | 32.9 | Female                          | 175                                | 59.3 |
| Parents of a child with CF ≥ 18 years | 33                                 | 11.2 | Other                           | 2                                  | 0.7  |
| Other*                                | 28                                 | 9.5  | Unknown                         | 5                                  | 1.7  |
| Respondent age (years)                |                                    |      | Country                         |                                    |      |
| <15                                   | 0                                  | 0    | Australia                       | 3                                  | 1    |
| 16-19                                 | 13                                 | 4.4  | Belgium                         | 5                                  | 1.7  |
| 20-29                                 | 62                                 | 21.0 | Brazil                          | 1                                  | 0.3  |
| 30-39                                 | 98                                 | 33.2 | Canada                          | 27                                 | 9.2  |
| 40-49                                 | 60                                 | 20.3 | France                          | 5                                  | 1.7  |
| 50-59                                 | 32                                 | 10.8 | ROI                             | 46                                 | 15.6 |
| 60-69                                 | 17                                 | 5.8  | Israel                          | 11                                 | 3.7  |
| 70+                                   | 5                                  | 1.7  | New Zealand                     | 3                                  | 1    |
| Unknown                               | 8                                  | 2.8  | UK                              | 47                                 | 15.9 |
| Respondent gender                     |                                    |      | South Africa                    | 25                                 | 8.5  |
| Male                                  | 67                                 | 22.7 | Sweden                          | 1                                  | 0.3  |
| Female                                | 222                                | 75.3 | UAE                             | 12                                 | 4.1  |
| Other                                 | 2                                  | 0.7  | USA                             | 107                                | 36.3 |
| Unknown                               | 4                                  | 1.4  | Unknown                         | 2                                  | 0.7  |
| PWCF age (years)                      |                                    |      | Continent                       |                                    |      |
| <10                                   | 69                                 | 23.4 | Africa                          | 25                                 | 8.5  |
| 10-15                                 | 27                                 | 9.2  | North & South America           | 135                                | 45.8 |
| 16-19                                 | 23                                 | 7.8  | Europe                          | 104                                | 35.3 |
| 20-29                                 | 67                                 | 22.7 | Australia & Oceania             | 6                                  | 2.0  |
| 30-39                                 | 66                                 | 22.4 | Asia                            | 23                                 | 7.8  |
| 40-49                                 | 28                                 | 9.5  | Unknown                         | 2                                  | 0.7  |
| 50-59                                 | 7                                  | 2.4  | English is an official language |                                    |      |
| 60-69                                 | 3                                  | 1    | Yes                             | 258                                | 87.5 |
| 70+                                   | 2                                  | 0.7  | No                              | 35                                 | 11.9 |
| Unknown                               | 3                                  | 1    | Unknown                         | 2                                  | 0.7  |

PWCF, person with cystic fibrosis; CF, cystic fibrosis; ROI, Republic of Ireland; UK, United Kingdom; USA, UAE, United Arab Emirates; United States of America.

\*caregivers, CF charity workers, family, friends, other.

## Notes:

Given the voluntary nature of the survey, none of the questions asked in the questionnaire were mandatory and as such, data is expressed (%) in terms of those individuals who answered the individual questions. Due to the small representation of some countries, they were grouped into continents for the purposes of statistical analysis. Similarly, parents were split into two groups; those with children <18 years old and those with children  $\geq 18$  years old. This is due to the fact that legally a child becomes an adult at age 18, therefore the groups reflected parents of adults and children.
