# Supplementary material for: What is the Perceived Role of the Dietitian Amongst People with Cystic Fibrosis? Results of an International survey
Source: Atypon-hosted journal article supplement (doi:10.3148/cjdpr-2022-044), 2023-03-29
Supplement: cjdpr-2022-044supplc.pdf [file cjdpr-2022-044supplc.pdf]

**Table:** The significant differences between how often cystic fibrosis information sources are consulted by respondents' continent

| <i>Source</i>                            | <i>Continent</i>      | <i>n</i> | Frequency of consulting cystic fibrosis information source |            |           |        |       | <i>P</i> |
|------------------------------------------|-----------------------|----------|------------------------------------------------------------|------------|-----------|--------|-------|----------|
|                                          |                       |          | Always                                                     | Frequently | Sometimes | Seldom | Never |          |
|                                          |                       |          | %                                                          | %          | %         | %      | %     |          |
| <i>Medical/Scientific Journals</i>       |                       |          |                                                            |            |           |        |       |          |
|                                          | North & South America | 119      | 21.8                                                       | 23.5       | 26.1      | 13.4   | 15.1  | <0.001   |
|                                          | Europe                | 89       | 5.6                                                        | 22.5       | 21.3      | 18.0   | 32.6  |          |
| <i>Medical/Scientific Search Engines</i> |                       |          |                                                            |            |           |        |       |          |
|                                          | North & South America | 119      | 21.8                                                       | 29.4       | 21.8      | 14.3   | 12.6  | 0.004    |
|                                          | Europe                | 89       | 7.9                                                        | 25.8       | 27.0      | 18.0   | 21.3  |          |

*P* value was obtained from Mann-Whitney *U* test, ( $P < 0.05$  was considered significant).
