# Supplementary material for: What is the Perceived Role of the Dietitian Amongst People with Cystic Fibrosis? Results of an International survey
Source: Atypon-hosted journal article supplement (doi:10.3148/cjdpr-2022-044), 2023-03-29
Supplement: cjdpr-2022-044suppld.pdf [file cjdpr-2022-044suppld.pdf]

**Table:** Perceived reliability of cystic fibrosis information sources and respondents' continent

| <i>Source</i>                      | <i>Continent</i> | <i>n</i> | Perceived reliability of cystic fibrosis information source |                         |               |                          |                      | <i>P</i> |
|------------------------------------|------------------|----------|-------------------------------------------------------------|-------------------------|---------------|--------------------------|----------------------|----------|
|                                    |                  |          | Very reliable<br>%                                          | Generally reliable<br>% | Not sure<br>% | Limited reliability<br>% | Very unreliable<br>% |          |
| <i>CF Dietitian</i>                |                  |          |                                                             |                         |               |                          |                      |          |
|                                    | Africa           | 19       | 21.1                                                        | 42.1                    | 15.8          | 15.8                     | 5.3                  | 0.011    |
|                                    | N&S America      | 109      | 48.6                                                        | 33.0                    | 12.8          | 4.6                      | 0.9                  |          |
|                                    | Africa           | 19       | 21.1                                                        | 42.1                    | 15.8          | 15.8                     | 5.3                  | 0.001    |
|                                    | Europe           | 89       | 57.3                                                        | 32.6                    | 5.6           | 2.2                      | 2.2                  |          |
|                                    | Africa           | 19       | 21.1                                                        | 42.1                    | 15.8          | 15.8                     | 5.3                  | 0.017    |
|                                    | Asia             | 20       | 55.0                                                        | 35.0                    | 5.0           | 0                        | 5.0                  |          |
| <i>Medical/Scientific Journals</i> |                  |          |                                                             |                         |               |                          |                      |          |
|                                    | Africa           | 20       | 30.0                                                        | 50                      | 15.0          | 5.0                      | 0                    | 0.045    |
|                                    | Europe           | 87       | 19.5                                                        | 31.0                    | 47.1          | 1.1                      | 1.1                  |          |
|                                    | N&S America      | 111      | 51.4                                                        | 31.5                    | 16.2          | 0.9                      | 0                    | <0.001   |
|                                    | Europe           | 87       | 19.5                                                        | 31.0                    | 47.1          | 1.1                      | 1.1                  |          |

*P* values were obtained from Mann-Whitney *U* tests, ( $P < 0.05$  was considered significant).
